# Supplementary material
Source: Copernicus journal article supplement (doi:10.5194/amt-19-3557-2026)
Supplement: Supplementary file 1 [file amt-19-3557-2026-supplement.pdf]

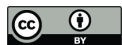

*Supplement of*

## **Correction and calibration protocol for isotope data via CRDS: a study case for N<sub>2</sub>O and other isotope systems**

**Julius C. Havsteen et al.**

*Correspondence to:* Julius C. Havsteen ([julius.havsteen@empa.ch](mailto:julius.havsteen@empa.ch)) and Joachim Mohn ([joachim.mohn@empa.ch](mailto:joachim.mohn@empa.ch))

The copyright of individual parts of the supplement might differ from the article licence.

## 1 Supplementary information

### 2 S.1 Experimental Setups and Workflows

3 Below, we provide a detailed description of the specific setup and conditions for each experiment conducted.

#### 4 S.1.1 N<sub>2</sub>O non-linearity (Exp. 1)

5 The experimental setup for Exp. 1 was designed to investigate the effect of N<sub>2</sub>O concentrations on apparent  $\delta$ -values. Nitrous  
6 oxide target concentrations were set in the range of 0.350 to 1.200 ppm, depending on the CRDS investigated (See Section 3.1  
7 for details). The target concentrations were achieved by adjusting calibration and dilution gas flows while maintaining a  
8 constant total flow of 1000 mL min<sup>-1</sup> (Table S1). Each mixture was measured in triplicate across three independent experiments  
9 to ensure reproducibility. A schematic of the gas mixing and measurement system is provided in Fig. S1.

10

11 **Table S1: Target concentrations and flow settings for calibration and sample mixtures (Samples 1–7) in Exp. 1**

| <i>Parameter</i>             | <i>Cal 1 / Cal 2</i> | <i>Sample 1</i> | <i>Sample 2</i> | <i>Sample 3</i> | <i>Sample 4</i> | <i>Sample 5</i> | <i>Sample 6</i> | <i>Sample 7</i> |
|------------------------------|----------------------|-----------------|-----------------|-----------------|-----------------|-----------------|-----------------|-----------------|
| <i>Target concentrations</i> |                      |                 |                 |                 |                 |                 |                 |                 |
| N <sub>2</sub> O (ppm)       | 0.35                 | 0.425           | 0.5             | 0.575           | 0.65            | 0.725           | 0.8             | 0.99            |
| <i>Target flows</i>          |                      |                 |                 |                 |                 |                 |                 |                 |
| Cal 1 / Cal 2                | 3.9                  | 4.7             | 5.6             | 6.4             | 7.2             | 8.1             | 8.9             | 11.0            |
| Dilution Gas                 | 996.1                | 993.8           | 991.3           | 986.3           | 976.3           | 966.3           | 956.3           | 989.0           |
| Total flow                   | 1000                 | 1000            | 1000            | 1000            | 1000            | 1000            | 1000            | 1000            |

*Each sample configuration was measured three times in three independent experiments.*

12

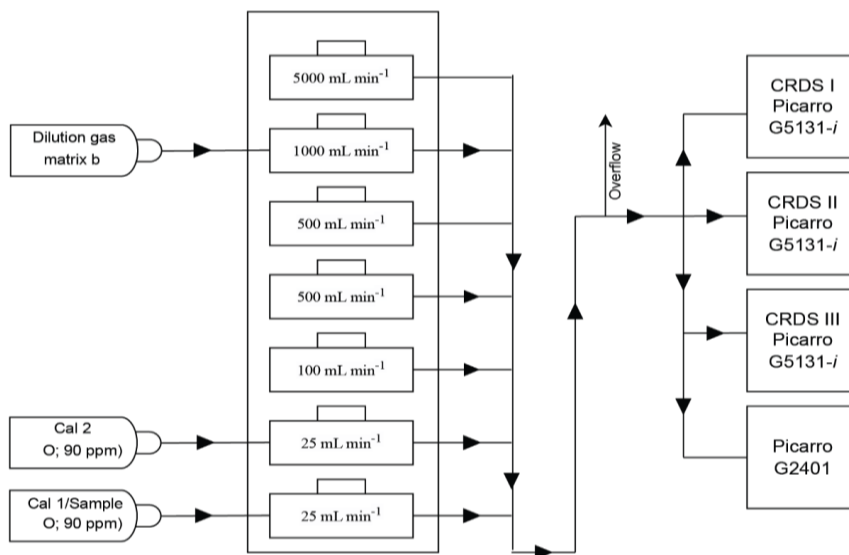

Figure S1: Schematic illustration of the experimental setup used for Exp. 1

### S.1.2 CH<sub>4</sub> spectral interference (Exp. 2)

The experimental setup for Exp. 2 was designed to investigate the effect of CH<sub>4</sub> concentrations on apparent  $\delta$ -values of N<sub>2</sub>O. Nitrous oxide target concentrations were set to 0.330, 0.660, and 0.990 ppm, while CH<sub>4</sub> were changed in the range from 0.5 to 10 ppm, and was achieved by adjusting calibration and dilution gas flows while maintaining a constant total flow of 1000 mL min<sup>-1</sup> (Table S2–S4). Each mixture was measured in triplicate across three independent experiments to ensure reproducibility. A schematic of the gas mixing and measurement system is provided in Fig. S2.

Table S2: Target concentrations and flow settings for calibration and sample mixtures (Samples 1–7) in Exp. 2

| Parameter                               | Cal 1 / Cal 2 | Sample 1 | Sample 2 | Sample 3 | Sample 4 | Sample 5 | Sample 6 | Sample 7 |
|-----------------------------------------|---------------|----------|----------|----------|----------|----------|----------|----------|
| <i>Target concentrations</i>            |               |          |          |          |          |          |          |          |
| CH <sub>4</sub> (ppm)                   | 0             | 0.5      | 1        | 2        | 4        | 6        | 8        | 10       |
| N <sub>2</sub> O (ppm)                  | 0.330         | 0.330    | 0.330    | 0.330    | 0.330    | 0.330    | 0.330    | 0.330    |
| <i>Target flows</i>                     |               |          |          |          |          |          |          |          |
| Cal 1 / Cal 2                           | 3.67          | 3.67     | 3.67     | 3.67     | 3.67     | 3.67     | 3.67     | 3.67     |
| Interferent test gas (CH <sub>4</sub> ) | 0             | 2.5      | 5        | 10       | 20       | 30       | 40       | 50       |
| Dilution Gas                            | 996.3         | 993.8    | 991.3    | 986.3    | 976.3    | 966.3    | 956.3    | 946.3    |
| Total flow                              | 1000          | 1000     | 1000     | 1000     | 1000     | 1000     | 1000     | 1000     |

*Each sample configuration was measured three times in three independent experiments.*

25 **Table S3: Target concentrations and flow settings for calibration and sample mixtures (Samples 1–7) in Exp. 2**

| Parameter                               | Cal 1 / Cal 2 | Sample 1 | Sample 2 | Sample 3 | Sample 4 | Sample 5 | Sample 6 | Sample 7 |
|-----------------------------------------|---------------|----------|----------|----------|----------|----------|----------|----------|
| <i>Target concentrations</i>            |               |          |          |          |          |          |          |          |
| CH <sub>4</sub> (ppm)                   | 0             | 0.5      | 1        | 2        | 4        | 6        | 8        | 10       |
| N <sub>2</sub> O (ppm)                  | 0.330         | 0.666    | 0.666    | 0.666    | 0.666    | 0.666    | 0.666    | 0.666    |
| <i>Target flows</i>                     |               |          |          |          |          |          |          |          |
| Cal 1 / Cal 2                           | 3.67          | 7.33     | 7.33     | 7.33     | 7.33     | 7.33     | 7.33     | 7.33     |
| Interferent test gas (CH <sub>4</sub> ) | 0             | 2.5      | 5        | 10       | 20       | 30       | 40       | 50       |
| Dilution Gas                            | 992.7         | 990.2    | 987.7    | 982.7    | 972.7    | 962.7    | 952.7    | 942.7    |
| Total flow                              | 1000          | 1000     | 1000     | 1000     | 1000     | 1000     | 1000     | 1000     |

Each sample configuration was measured three times in three independent experiments.

26

27 **Table S4: Target concentrations and flow settings for calibration and sample mixtures (Samples 1–7) in Exp. 2**

| Parameter                               | Cal 1 / Cal 2 | Sample 1 | Sample 2 | Sample 3 | Sample 4 | Sample 5 | Sample 6 | Sample 7 |
|-----------------------------------------|---------------|----------|----------|----------|----------|----------|----------|----------|
| <i>Target concentrations</i>            |               |          |          |          |          |          |          |          |
| CH <sub>4</sub> (ppm)                   | 0             | 0.5      | 1        | 2        | 4        | 6        | 8        | 10       |
| N <sub>2</sub> O (ppm)                  | 0.330         | 0.990    | 0.990    | 0.990    | 0.990    | 0.990    | 0.990    | 0.990    |
| <i>Target flows</i>                     |               |          |          |          |          |          |          |          |
| Cal 1 / Cal 2                           | 3.67          | 11       | 11       | 11       | 11       | 11       | 11       | 11       |
| Interferent test gas (CH <sub>4</sub> ) | 0             | 2.5      | 5        | 10       | 20       | 30       | 40       | 50       |
| Dilution Gas                            | 992.7         | 986.5    | 984.0    | 979.0    | 969.0    | 959.0    | 949.0    | 939.0    |
| Total flow                              | 1000          | 1000     | 1000     | 1000     | 1000     | 1000     | 1000     | 1000     |

Each sample configuration was measured three times in three independent experiments.

28

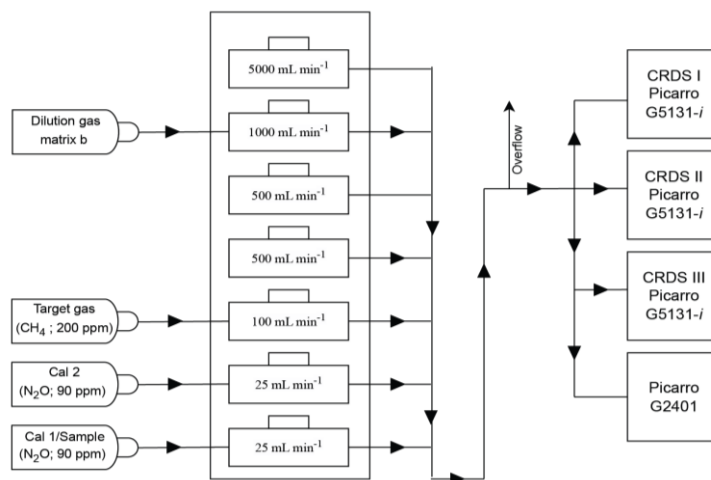

29

30

**Figure S2: Schematic illustration of the experimental setup used for Exp. 2**

31 **S.1.3 CO<sub>2</sub> spectral interference (Exp. 3)**

32 The experimental setup for Exp. 3 was designed to investigate the effect of CO<sub>2</sub> concentrations on apparent  $\delta$ -values of N<sub>2</sub>O.  
 33 Nitrous oxide target concentrations were set to 0.330, 0.660, and 0.990 ppm, while CO<sub>2</sub> were changed in the range from 0 to  
 34 2000 ppm, and was achieved by adjusting calibration and dilution gas flows while maintaining a constant total flow of 1000  
 35 mL min<sup>-1</sup> (Table S5–S7). Each mixture was measured in triplicate across three independent experiments to ensure  
 36 reproducibility. A schematic of the gas mixing and measurement system is provided in Fig. S3.

37  
 38 **Table S5: Target concentrations and flow settings for calibration and sample mixtures (Samples 1–7) in Exp. 3**

| <i>Parameter</i>                           | <i>Cal 1 /<br/>Cal 2</i> | <i>Sample<br/>1</i> | <i>Sample<br/>2</i> | <i>Sample<br/>3</i> | <i>Sample<br/>4</i> | <i>Sample<br/>5</i> | <i>Sample<br/>6</i> | <i>Sample<br/>7</i> |
|--------------------------------------------|--------------------------|---------------------|---------------------|---------------------|---------------------|---------------------|---------------------|---------------------|
| <i>Target concentrations</i>               |                          |                     |                     |                     |                     |                     |                     |                     |
| CO <sub>2</sub> (ppm)                      | 0                        | 0                   | 250                 | 500                 | 750                 | 1000                | 1500                | 2000                |
| N <sub>2</sub> O (ppm)                     | 0.330                    | 0.330               | 0.330               | 0.330               | 0.330               | 0.330               | 0.330               | 0.330               |
| <i>Target flows</i>                        |                          |                     |                     |                     |                     |                     |                     |                     |
| Cal 1 / Cal 2                              | 3.7                      | 3.7                 | 3.7                 | 3.7                 | 3.7                 | 3.7                 | 3.7                 | 3.7                 |
| Interferent test gas<br>(CO <sub>2</sub> ) | 0.0                      | 0.0                 | 6.3                 | 12.5                | 18.8                | 25.0                | 37.5                | 50.0                |
| Dilution Gas                               | 996.3                    | 996.3               | 990.1               | 983.8               | 977.6               | 971.3               | 958.8               | 946.3               |
| Total flow                                 | 1000                     | 1000                | 1000                | 1000                | 1000                | 1000                | 1000                | 1000                |

*Each sample configuration was measured three times in three independent experiments.*

39

40 **Table S6: Target concentrations and flow settings for calibration and sample mixtures (Samples 1–7) in Exp. 3**

| <i>Parameter</i>                           | <i>Cal 1 /<br/>Cal 2</i> | <i>Sample<br/>1</i> | <i>Sample<br/>2</i> | <i>Sample<br/>3</i> | <i>Sample<br/>4</i> | <i>Sample<br/>5</i> | <i>Sample<br/>6</i> | <i>Sample<br/>7</i> |
|--------------------------------------------|--------------------------|---------------------|---------------------|---------------------|---------------------|---------------------|---------------------|---------------------|
| <i>Target concentrations</i>               |                          |                     |                     |                     |                     |                     |                     |                     |
| CO <sub>2</sub> (ppm)                      | 0                        | 0                   | 250                 | 500                 | 750                 | 1000                | 1500                | 2000                |
| N <sub>2</sub> O (ppm)                     | 0.330                    | 0.660               | 0.660               | 0.660               | 0.660               | 0.660               | 0.660               | 0.660               |
| <i>Target flows</i>                        |                          |                     |                     |                     |                     |                     |                     |                     |
| Cal 1 / Cal 2                              | 3.7                      | 7.3                 | 7.3                 | 7.3                 | 7.3                 | 7.3                 | 7.3                 | 7.3                 |
| Interferent test gas<br>(CO <sub>2</sub> ) | 0.0                      | 0.0                 | 6.3                 | 12.5                | 18.8                | 25.0                | 37.5                | 50.0                |
| Dilution Gas                               | 996.3                    | 992.7               | 986.4               | 980.2               | 973.9               | 967.7               | 955.2               | 942.7               |
| Total flow                                 | 1000                     | 1000                | 1000                | 1000                | 1000                | 1000                | 1000                | 1000                |

*Each sample configuration was measured three times in three independent experiments.*

41

42

43

44

45 **Table S7: Target concentrations and flow settings for calibration and sample mixtures (Samples 1–7) in Exp. 3**

| <i>Parameter</i>                           | <i>Cal 1 /<br/>Cal 2</i> | <i>Sample<br/>1</i> | <i>Sample<br/>2</i> | <i>Sample<br/>3</i> | <i>Sample<br/>4</i> | <i>Sample<br/>5</i> | <i>Sample<br/>6</i> | <i>Sample<br/>7</i> |
|--------------------------------------------|--------------------------|---------------------|---------------------|---------------------|---------------------|---------------------|---------------------|---------------------|
| <i>Target concentrations</i>               |                          |                     |                     |                     |                     |                     |                     |                     |
| CO <sub>2</sub> (ppm)                      | 0                        | 0                   | 250                 | 500                 | 750                 | 1000                | 1500                | 2000                |
| N <sub>2</sub> O (ppm)                     | 0.330                    | 0.990               | 0.990               | 0.990               | 0.990               | 0.990               | 0.990               | 0.990               |
| <i>Target flows</i>                        |                          |                     |                     |                     |                     |                     |                     |                     |
| Cal 1 / Cal 2                              | 3.7                      | 11.0                | 11.0                | 11.0                | 11.0                | 11.0                | 11.0                | 11.0                |
| Interferent test gas<br>(CO <sub>2</sub> ) | 0.0                      | 0.0                 | 6.3                 | 12.5                | 18.8                | 25.0                | 37.5                | 50.0                |
| Dilution Gas                               | 996.3                    | 989.0               | 982.8               | 976.5               | 970.3               | 964.0               | 951.5               | 939.0               |
| Total flow                                 | 1000                     | 1000                | 1000                | 1000                | 1000                | 1000                | 1000                | 1000                |

46 *Each sample configuration was measured three times in three independent experiments.*

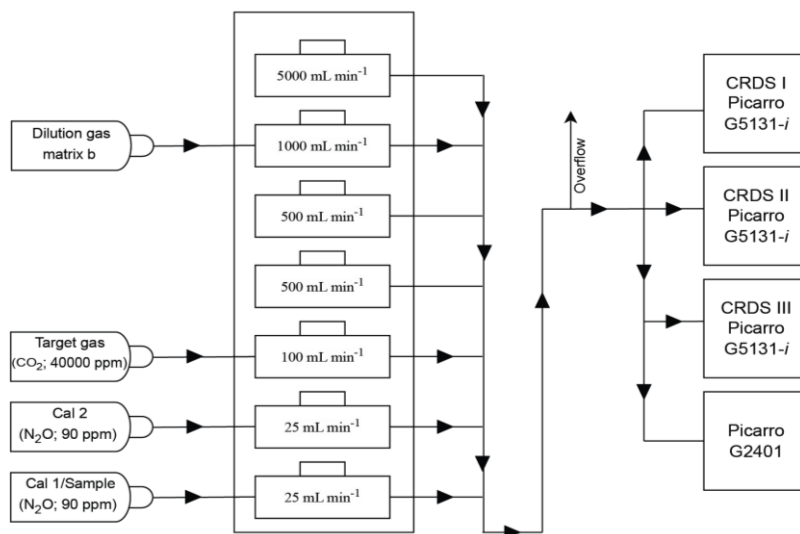

48 **Figure S3: Schematic illustration of the experimental setup used for Exp. 3**

49 **S.1.4 O<sub>2</sub> matrix gas effect (Exp. 4)**

50 The experimental setup for Exp. 4 was designed to investigate the effect of O<sub>2</sub> concentrations on apparent  $\delta$ -values of N<sub>2</sub>O.  
 51 Nitrous oxide target concentrations were set to 0.330, 0.660, and 0.990 ppm, while O<sub>2</sub> were diluted down from ~21 to ~0%,  
 52 achieved by adjusting calibration and dilution gas flows while maintaining a constant total flow of 1000 mL min<sup>-1</sup> (Table S8–  
 53 S10). Each mixture was measured in triplicate across three independent experiments to ensure reproducibility. A schematic of  
 54 the gas mixing and measurement system is provided in Fig. S4. Please note that the target oxygen concentrations were set at  
 55 12, 14, 16, 20, and 20.7%. However, since the *Cal 1* and *Cal 2* reference gases contribute an additional matrix baseline of  
 56 approximately 770, 1544, and 2316 ppm O<sub>2</sub> at N<sub>2</sub>O concentrations of 330, 660, and 990 ppb, respectively, meaning that target  
 57 O<sub>2</sub> values do not start from zero as they do for N<sub>2</sub>O.  
 58

59 **Table S8: Target concentrations and flow settings for calibration and sample mixtures (Samples 1–7) in Exp. 4**

| <i>Parameter</i>                       | <i>Cal 1 /<br/>Cal 2</i> | <i>Sample<br/>1</i> | <i>Sample<br/>2</i> | <i>Sample<br/>3</i> | <i>Sample<br/>4</i> | <i>Sample<br/>5</i> | <i>Sample<br/>6</i> | <i>Sample<br/>7</i> |
|----------------------------------------|--------------------------|---------------------|---------------------|---------------------|---------------------|---------------------|---------------------|---------------------|
| <i>Target concentrations</i>           |                          |                     |                     |                     |                     |                     |                     |                     |
| O <sub>2</sub> (ppm)                   | 770                      | 770                 | 120000              | 140000              | 160000              | 180000              | 200000              | 207000              |
| N <sub>2</sub> O (ppm)                 | 0.330                    | 0.330               | 0.330               | 0.330               | 0.330               | 0.330               | 0.330               | 0.330               |
| <i>Target flows</i>                    |                          |                     |                     |                     |                     |                     |                     |                     |
| Cal 1 / Cal 2                          | 3.7                      | 3.7                 | 3.7                 | 3.7                 | 3.7                 | 3.7                 | 3.7                 | 3.7                 |
| Interferent test gas (O <sub>2</sub> ) | 0.0                      | 0.0                 | 572.8               | 668.3               | 763.7               | 859.2               | 954.7               | 988.1               |
| Dilution Gas (N <sub>2</sub> )         | 996.3                    | 996.3               | 423.5               | 328.1               | 232.6               | 137.1               | 41.7                | 8.3                 |
| Total flow                             | 1000                     | 1000                | 1000                | 1000                | 1000                | 1000                | 1000                | 1000                |

*Each sample configuration was measured three times in three independent experiments, and all flows are in mL/min*

60

61 **Table S9: Target concentrations and flow settings for calibration and sample mixtures (Samples 1–7) in Exp. 4**

| <i>Parameter</i>                       | <i>Cal 1 /<br/>Cal 2</i> | <i>Sample<br/>1</i> | <i>Sample 2</i> | <i>Sample 3</i> | <i>Sample 4</i> | <i>Sample 5</i> | <i>Sample 6</i> | <i>Sample 7</i> |
|----------------------------------------|--------------------------|---------------------|-----------------|-----------------|-----------------|-----------------|-----------------|-----------------|
| <i>Target concentrations</i>           |                          |                     |                 |                 |                 |                 |                 |                 |
| O <sub>2</sub> (ppm)                   | 770                      | 1544                | 120000          | 140000          | 160000          | 180000          | 200000          | 207000          |
| N <sub>2</sub> O (ppm)                 | 0.330                    | 0.660               | 0.660           | 0.660           | 0.660           | 0.660           | 0.660           | 0.660           |
| <i>Target flows</i>                    |                          |                     |                 |                 |                 |                 |                 |                 |
| Cal 1 / Cal 2                          | 3.7                      | 7.3                 | 7.3             | 7.3             | 7.3             | 7.3             | 7.3             | 7.3             |
| Interferent test gas (O <sub>2</sub> ) | 0.0                      | 0.0                 | 572.8           | 668.3           | 763.7           | 859.2           | 954.7           | 988.1           |
| Dilution Gas (N <sub>2</sub> )         | 996.3                    | 992.7               | 419.9           | 324.4           | 228.9           | 133.5           | 38.0            | 4.6             |
| Total flow                             | 1000                     | 1000                | 1000            | 1000            | 1000            | 1000            | 1000            | 1000            |

*Each sample configuration was measured three times in three independent experiments, and all flows are in mL/min*

62

63 **Table S10: Target concentrations and flow settings for calibration and sample mixtures (Samples 1–7) in Exp. 4**

| <i>Parameter</i>                       | <i>Cal 1 /<br/>Cal 2</i> | <i>Sample<br/>1</i> | <i>Sample 2</i> | <i>Sample 3</i> | <i>Sample 4</i> | <i>Sample 5</i> | <i>Sample 6</i> | <i>Sample<br/>7</i> |
|----------------------------------------|--------------------------|---------------------|-----------------|-----------------|-----------------|-----------------|-----------------|---------------------|
| <i>Target concentrations</i>           |                          |                     |                 |                 |                 |                 |                 |                     |
| O <sub>2</sub> (ppm)                   | 770                      | 2316                | 120000          | 140000          | 160000          | 180000          | 200000          | 207000              |
| N <sub>2</sub> O (ppm)                 | 0.330                    | 0.990               | 0.990           | 0.990           | 0.990           | 0.990           | 0.990           | 0.990               |
| <i>Target flows</i>                    |                          |                     |                 |                 |                 |                 |                 |                     |
| Cal 1 / Cal 2                          | 3.7                      | 11.0                | 11.0            | 11.0            | 11.0            | 11.0            | 11.0            | 11.0                |
| Interferent test gas (O <sub>2</sub> ) | 0.0                      | 0.0                 | 572.8           | 668.3           | 763.7           | 859.2           | 954.7           | 988.1               |
| Dilution Gas (N <sub>2</sub> )         | 996.3                    | 989.0               | 416.2           | 320.7           | 225.3           | 129.8           | 34.3            | 0.9                 |
| Total flow                             | 1000                     | 1000                | 1000            | 1000            | 1000            | 1000            | 1000            | 1000                |

*Each sample configuration was measured three times in three independent experiments, and all flows are in mL/min*

64

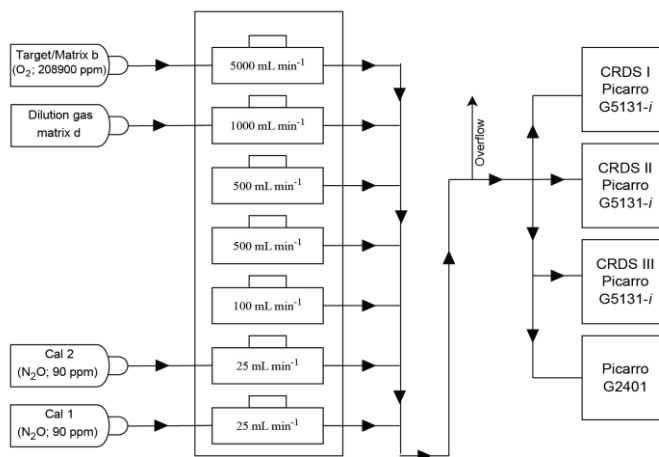

Figure S4: Schematic illustration of the experimental setup used for Exp. 4

66

67

68

### 69 S.1.5 Validation experiments to test combined effects of N<sub>2</sub>O, CH<sub>4</sub> and CO<sub>2</sub> concentration changes (Exp. 5)

70 The experimental setup for Exp. 5 was designed to investigate the combined effects of CO<sub>2</sub> and CH<sub>4</sub> on apparent  $\delta$ -values of  
 71 N<sub>2</sub>O. Nitrous oxide target concentrations were set to 0.330 and 0.660. Carbon dioxide and methane were simultaneously varied  
 72 from 0 to 2000 ppm and 0 to 10 ppm, respectively, over five steps (Table S11–S12). Each mixture was measured in triplicate  
 73 across three independent experiments to ensure reproducibility. A schematic of the gas mixing and measurement system is  
 74 provided in Fig. S5.

75

76 **Table S11: Target concentrations and flow settings for calibration and sample mixtures (Samples 1–5) Exp. 5a**

| <i>Parameter</i>                        | <i>Cal 1 / Cal 2</i> | <i>Sample 1</i> | <i>Sample 2</i> | <i>Sample 3</i> | <i>Sample 4</i> | <i>Sample 5</i> |
|-----------------------------------------|----------------------|-----------------|-----------------|-----------------|-----------------|-----------------|
| <i>Target concentrations</i>            |                      |                 |                 |                 |                 |                 |
| CH <sub>4</sub> (ppm)                   | 0                    | 0               | 2.5             | 5               | 7.5             | 10              |
| CO <sub>2</sub> (ppm)                   | 0                    | 0               | 500             | 1000            | 1500            | 2000            |
| N <sub>2</sub> O (ppm)                  | 0.330                | 0.330           | 0.330           | 0.330           | 0.330           | 0.330           |
| <i>Target flows</i>                     |                      |                 |                 |                 |                 |                 |
| Cal 1 / Cal 2                           | 3.7                  | 3.7             | 3.7             | 3.7             | 3.7             | 3.7             |
| Interferent test gas (CH <sub>4</sub> ) | 0.0                  | 0.0             | 12.8            | 25.6            | 38.4            | 51.2            |
| Interferent test gas (CO <sub>2</sub> ) | 0.0                  | 0.0             | 12.7            | 25.4            | 38.0            | 50.7            |
| Dilution Gas                            | 996.3                | 996.3           | 970.9           | 945.4           | 919.9           | 894.4           |

Total flow 1000 1000 1000 1000 1000 1000

Each sample configuration was measured three times in three independent experiments, and all flows are in mL/min

77

78 **Table S12: Target concentrations and flow settings for calibration and sample mixtures (Samples 1–5) in Exp. 5b**

| Parameter                               | Cal 1 / Cal 2 | Sample 1 | Sample 2 | Sample 3 | Sample 4 | Sample 5 |
|-----------------------------------------|---------------|----------|----------|----------|----------|----------|
| <i>Target concentrations</i>            |               |          |          |          |          |          |
| CH <sub>4</sub> (ppm)                   | 0             | 0        | 2.5      | 5        | 7.5      | 10       |
| CO <sub>2</sub> (ppm)                   | 0             | 0        | 500      | 1000     | 1500     | 2000     |
| N <sub>2</sub> O (ppm)                  | 0.660         | 0.660    | 0.660    | 0.660    | 0.660    | 0.660    |
| <i>Target flows</i>                     |               |          |          |          |          |          |
| Cal 1 / Cal 2                           | 7.3           | 7.3      | 7.3      | 7.3      | 7.3      | 7.3      |
| Interferent test gas (CH <sub>4</sub> ) | 0.0           | 0.0      | 12.8     | 25.6     | 38.4     | 51.2     |
| Interferent test gas (CO <sub>2</sub> ) | 0.0           | 0.0      | 12.7     | 25.4     | 38.0     | 50.7     |
| Dilution Gas                            | 992.6         | 992.6    | 967.2    | 941.7    | 916.2    | 890.8    |
| Total flow                              | 1000          | 1000     | 1000     | 1000     | 1000     | 1000     |

Each sample configuration was measured three times in three independent experiments

All flows are in mL/min

79

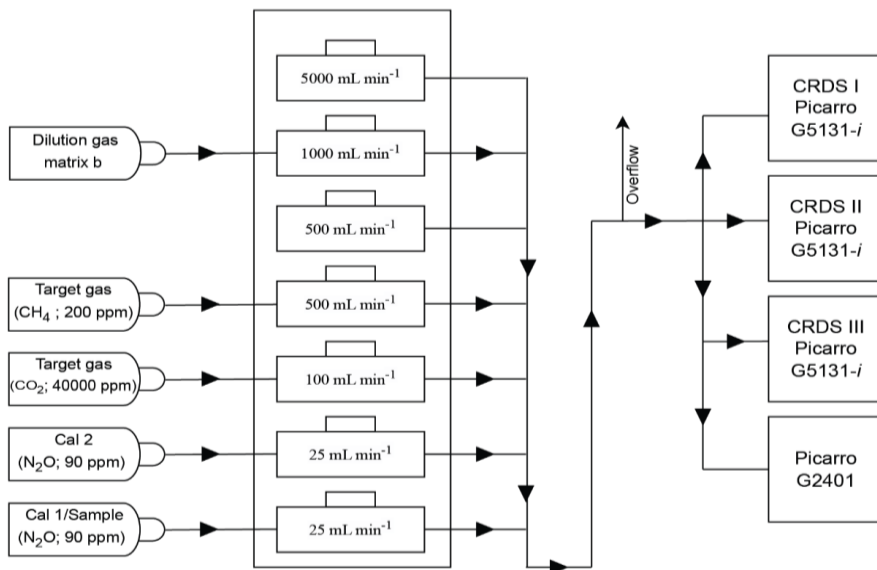

80 **Figure S5: Schematic illustration of the experimental setup used for Exp. 5**

81

82

83 **S.1.6 Validation of dynamic versus static dilution of reference gases (Exp. 6)**

84 The experimental setup for Exp. 6 was designed to test the difference between dynamic and static dilution of the same reference  
 85 gas. Nitrous oxide was diluted down to ambient concentrations from a pure N<sub>2</sub>O standard (RM-1-1<sub>pure</sub>). This was achieved  
 86 using a custom-built two-step diluter provided by the Swiss National Metrology Institute (METAS), followed by a third  
 87 dilution step with standalone MFC boxes. A schematic of the gas mixing and measurement system is provided in Fig. S6,  
 88 while Table S13 provides an overview of the dilution process.

89

90 **Table S13: Target concentrations and flow settings for calibration and sample mixtures (Samples 1–7) in Exp. 6**

| Dilution device              | Step           | RM-1-1 <sub>pure</sub><br>(N <sub>2</sub> O ppm) | Target<br>(N <sub>2</sub> O ppm) | Total flow | MFC #1,<br>(RM-1-1 <sub>pure</sub> ) | MFC #2<br>(Matrix b) |
|------------------------------|----------------|--------------------------------------------------|----------------------------------|------------|--------------------------------------|----------------------|
| two-step diluter<br>(Metas)  | 1.1 (Ch. #1)   | 1000000                                          | 3000                             | 5005       | 15                                   | 4985                 |
|                              | 1.2 (Ch. #2)   | 3000                                             | 10                               | 5000       | 17                                   | 4983                 |
| MFC<br>(Vögtlin Instruments) | 2 (Extra dil.) | 10                                               | 0.330                            | 500        | 16.5                                 | 483.5                |

*All flows are in mL/min. RM-1-1<sub>Diluted-1</sub> and RM-1-1<sub>Diluted-2</sub> have ambient N<sub>2</sub>O concentrations and therefore were introduced without dilution. For Cal 1 and 2, both at ~90 ppm, were diluted in a single step using Mixing Chamber 1, identical to the general experimental setup (See for example, Table 2).*

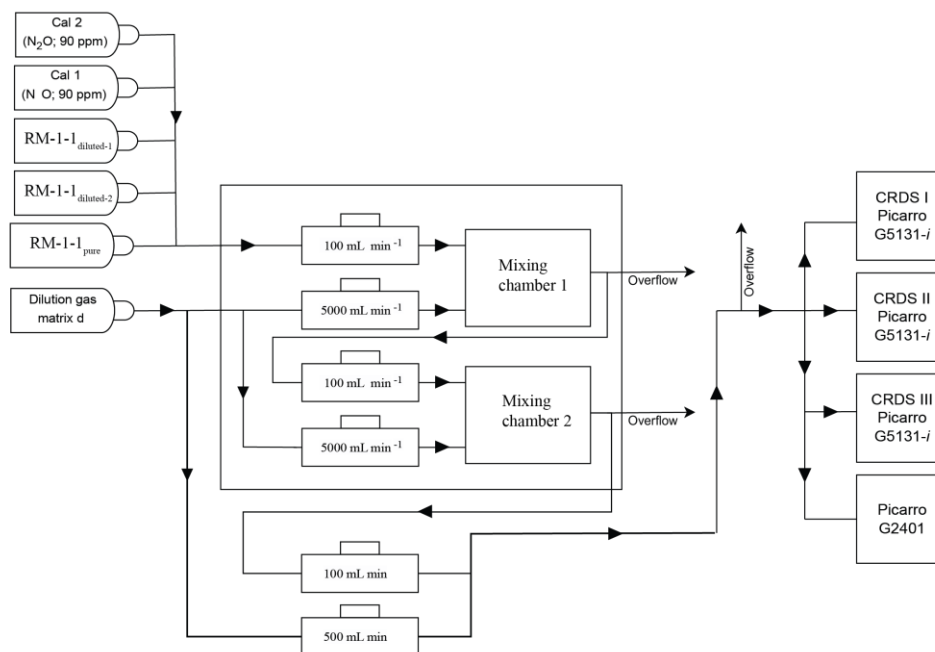

92

93 **Figure S6: Schematic illustration of the experimental setup used for Exp. 6. RM-1-1<sub>Diluted-1</sub> and RM-1-1<sub>Diluted-2</sub> have ambient N<sub>2</sub>O**  
 94 **concentrations and were therefore routed directly through the system without the use of a dilution gas. Cal 1 and Cal 2 were diluted**  
 95 **in a single step in mixing chamber 1, analogous to the general experimental setup, with flow rates as given for example in Table S2.**  
 96 **RM-1-1<sub>Pure</sub> was diluted dynamically to ambient concentrations via the three-step dilution scheme described in Table S13.**

## 97 **S2 Results: dynamic versus static dilution comparison (Exp. 6)**

98 We conducted a study to validate the preparation of statically diluted standards (RM-1-1<sub>Diluted-1</sub> and  
 99 RM-1-1<sub>Diluted-2</sub>; Table 1), which might be subject to fractionation effects during preparation, against dynamically  
 100 prepared gases

101 starting from the same pure N<sub>2</sub>O reference gas (RM-1-1<sub>Pure</sub>; Table 1). The key distinction is that RM-1-1<sub>pure</sub> is  
 102 an

103 undiluted pure N<sub>2</sub>O standard, while RM-1-1<sub>Diluted-1</sub> and RM-1-1<sub>Diluted-2</sub> are gravimetrically prepared  
 104 ambient-concentration dilutions of the same gas (~327; Table 1), which were prepared according to Mohn et al.  
 105 (2014). The dynamic dilution approach prepares the same gas at ambient concentration in real time using a  
 106 sequence of dilution

107 steps. To facilitate dynamic dilution from pure gases to ambient concentrations (330 ppb N<sub>2</sub>O), i.e. by a factor of  
 108  $3.3 \times 10^6$ , a custom-built two-step diluter provided by the Swiss Federal Institute of Metrology (METAS),  
 109 was

applied. Given the very low flows of pure N<sub>2</sub>O provided, an extensive stabilisation period of 1 hour was applied,  
 with data from the last 5 minutes used for further analysis. The statically diluted standard gases were measured  
 for

110 of RM-1-1<sub>Diluted-1</sub> and Cal 2.1<sub>330ppb</sub> were bracketing the measuring phase (phase 2). During the measuring phase,  
111 each sample gas measurement was bracketed by measurement of the RM-1-1<sub>Diluted-1</sub> standard gas to continuously  
112 assess the analyser's stability and post-correct for any analytical drift.

113 Results from comparing dynamic versus static dilutions of the same initial pure N<sub>2</sub>O gas (RM-1-1<sub>pure</sub>) show no  
114 significant differences between the two approaches (Fig. S7). For  $\delta^{15}\text{N}^{\alpha}$ , both the statically diluted N<sub>2</sub>O gas (RM-  
115 1-1<sub>Diluted-2</sub>) and the dynamically diluted N<sub>2</sub>O gas (diluted from RM-1-1<sub>pure</sub>) fall within the assigned value of  $-0.22 \pm$   
116  $0.46 \text{ ‰ (SD)}$ , with RM-1-1<sub>Diluted-2</sub> registering at  $-0.09 \pm 1 \text{ ‰ (SD)}$  and RM-1-1<sub>pure</sub>  $-0.30 \pm 0.9 \text{ ‰ (SD)}$ . Concerning  
117  $\delta^{15}\text{N}^{\beta}$ , the statically diluted N<sub>2</sub>O gas agrees better with the original pure N<sub>2</sub>O, with a value of  $0.93 \pm 1.2 \text{ ‰ (SD)}$   
118 relative to the assigned value of  $0.82 \pm 0.46 \text{ ‰ (SD)}$ , while the dynamically diluted N<sub>2</sub>O gas displays large  
119 variability within  $-0.97 \pm 3.6 \text{ ‰ (SD)}$ . Lastly, a similar trend is seen for  $\delta^{18}\text{O}$ , where the static dilution approach  
120 exhibits a value of  $38.94 \pm 1.2 \text{ ‰ (SD)}$ , in line with the assigned value of  $39.22 \pm 0.15 \text{ ‰ (SD)}$ , while the dynamic  
121 dilution displays a slightly lower number of  $38.43 \pm 2.7 \text{ ‰ (SD)}$ . For the dynamically diluted calculations, only  
122 data points where the post-processed data had a standard deviation below 8 ‰ were included in the analyses. In  
123 summary, no significant offsets in isotopic composition between statically and dynamically prepared ambient  
124 concentration N<sub>2</sub>O reference gases were detected, which indicates the absence of substantial fractionation effects.  
125 Dynamically prepared N<sub>2</sub>O reference gases, however, display large variability in N<sub>2</sub>O isotopic composition, in  
126 particular for  $\delta^{15}\text{N}^{\beta}$ . This effect might not be a fractionation effect, which is supposed to impart all isotopic  
127 dimensions, but an apparent effect due to variability in the gas composition (e.g. N<sub>2</sub>O concentration), provided the  
128 very high dilution ratios. Results also indicate that the applied two-step dynamic dilution is not a suitable approach  
129 to provide N<sub>2</sub>O reference gases at 330 ppb N<sub>2</sub>O at sufficient stability to perform instrument calibration.

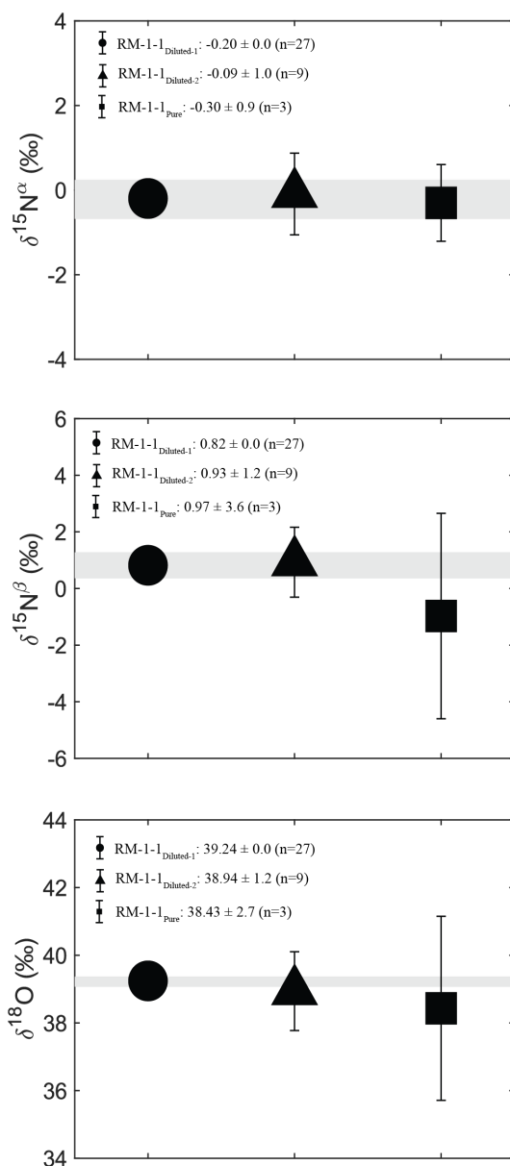

131 **Figure S7:** Isotopic composition,  $\delta^{15}\text{N}^\alpha$ ,  $\delta^{15}\text{N}^\beta$ ,  $\delta^{18}\text{O}$  in  $\text{N}_2\text{O}$  reference gases prepared by static dilution (RM-1-1<sub>Diluted-2</sub>) and  
 132 dynamic dilution from a pure  $\text{N}_2\text{O}$  gas (RM-1-1<sub>pure</sub>) (see Table 1) measured on CRDS II. The grey box represents the isotopic  
 133 composition  $\pm$  its uncertainty ( $\delta^{15}\text{N}^\alpha = -0.22 \pm 0.46$  ‰,  $\delta^{15}\text{N}^\beta = 0.82 \pm 0.46$  ‰,  $\delta^{18}\text{O} = 39.22 \pm 0.15$  ‰) of a statically diluted  
 134  $\text{N}_2\text{O}$  reference gas used for comparison (RM-1-1<sub>Diluted-1</sub>).

## 135 S3 Uncertainty Evaluation and Error Propagation

### 136 S.3.1 Input parameters

137 Calibration-based measurement models, commonly used for CRDS analysers and similar devices, present the  
138 challenge that each applied correction introduces its own inherent uncertainty. To better understand and pinpoint  
139 the primary sources of error and gain deeper insight into their influence on the overall measurement uncertainty,  
140 we conducted an uncertainty evaluation using the error propagation of up to 7 parameters per delta value. These  
141 parameters include the regression slopes ( $m_{N_2O}$ ,  $m_{CH_4}$ ,  $m_{CO_2}$ ) used for the trace gas-related corrections ( $N_2O$ ,  $CH_4$   
142 and  $CO_2$ ), the  $\delta$ -values of the applied isotopic reference gases, and an additional term due to poorly-understood  
143 effects, related to instrumental drifts and other uncharacterised aspects of the measurement system. This could be  
144 expressed by the standard deviation of repeated target gas analyses. The uncertainties were evaluated using the  
145 GUM guideline (BIPM et al., 2008; JCGM, 2008) and using the law of propagation of uncertainty to yield the  
146 combined standard uncertainty

147

$$148 \quad \sigma^2 (f(x_i)) = \sum_{i=1}^N \left( \sigma^2(x_i) * \left( \frac{\partial f}{\partial x_i} \right)^2 \right) * u^2(x_i)$$

149

150 *Where*  $f$  is the mathematical model reported in Appendix A,  $x_i$  is the input quantity, and  $u(x_i)$  the uncertainty of  
151 each of the input variables. The partial derivatives are provided in Appendix A and describe how  
152 sensitive the measurand responds to changes in a given input variable. In the implemented error analysis, we  
153 anticipate that the applied mathematical measurement model is correct, i.e. correction terms are additive and  
154 constant in time. As spectral interferences were observed to be non-additive and the  $N_2O$  non-linearity was  
155 found to be variable in time (see Section 3), the uncertainty evaluation implemented in the MATLAB code is  
156 only valid for a best case and should be taken with care.

### 157 S.3.2 Example of uncertainty budget

158 To provide an exemplary uncertainty estimate, we evaluated the uncertainty components for experiment 2 (sec. 3.2) performed  
159 at 330 ppb  $N_2O$  (Cal-1) with different additions in  $CH_4$  (up to 10 ppm). In detail, measurements on 05.02.2024 with CRDS-I  
160 were evaluated. The following input parameters for the uncertainty calculations were considered; the uncertainties in the  $N_2O$   
161 non-linearity correction slope ( $\Delta m_{N_2O}$ ), the  $CH_4$  correction slope ( $\Delta m_{CH_4}$ ), and the isotopic composition of  $Cal_{1,1}$  and  $Cal_{2,1}$   
162 reference gases, provided in Tables 4, 5, and 1, respectively. The uncertainty contribution by the  $N_2O$  concentration correction  
163 (Eq. A20) is negligible for all delta values ( $< 0.01$  %), since sample and reference gases are measured at similar  $N_2O$

164 concentration (330 ppb). The uncertainty due to "imperfect" CH<sub>4</sub> spectral interference correction (Eq. A21) increases with  
165 increasing CH<sub>4</sub> concentration, up to 0.23 ‰ in  $\delta^{15}\text{N}^{\alpha}$ , 0.13 ‰ in  $\delta^{15}\text{N}^{\beta}$  and 0.05 ‰ in  $\delta^{18}\text{O}$  for the highest CH<sub>4</sub> sample (10  
166 ppm). The propagated uncertainty due to the calibration correction (Eq. A23-A24) is approximately 0.31 ‰ in  $\delta^{15}\text{N}^{\alpha}$ , 0.11 ‰  
167 in  $\delta^{15}\text{N}^{\beta}$ , and 0.35 ‰ in  $\delta^{18}\text{O}$ . The uncertainty due to poorly understood effects, estimated by the repeatability of target gas  
168 measurements, is 0.5 ‰ for all isotopologues. The total uncertainties (Eq. A19) for the N<sub>2</sub>O sample gas with 10 ppm CH<sub>4</sub>  
169 sample are 0.63 ‰, 0.53 ‰, 0.62 ‰ for  $\delta^{15}\text{N}^{\alpha}$ ,  $\delta^{15}\text{N}^{\beta}$  and  $\delta^{18}\text{O}$ , respectively.

170 **References**

- 171 BIPM, I., Ifcc, I., & Iso, I. (2008). IUPaP, and OImL. *Evaluation of measurement data—Supplement, 1*.
- 172 JCGM, J. (2008). Evaluation of measurement data—Guide to the expression of uncertainty in measurement. *Int. Organ.*  
173 *Stand. Geneva ISBN, 50*, 134.
- 174 Mohn, J., Wolf, B., Toyoda, S., Lin, C. T., Liang, M. C., Brüggemann, N., Wissel, H., Steiker, A. E., Dyckmans, J., &  
175 Szwec, L. (2014). Interlaboratory assessment of nitrous oxide isotopomer analysis by isotope ratio mass  
176 spectrometry and laser spectroscopy: current status and perspectives. *Rapid Communications in Mass Spectrometry*,  
177 *28*(18), 1995–2007.
- 178
